CORRECTION

# Correction: Context-Dependent Plastic Response during Egg-Laying in a Widespread Newt Species

Zoltán Tóth

There is an error in [Fig 3](#): The regression line in the published [Fig 3](#) indicates a linear relationship between egg size and hatching success; however, a generalized linear mixed-effect model was used to analyze the relationship of these variables, which is not a linear one. Please see the correct [Fig 3](#) here.

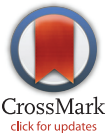

 OPEN ACCESS

**Citation:** Tóth Z (2015) Correction: Context-Dependent Plastic Response during Egg-Laying in a Widespread Newt Species. PLoS ONE 10(9): e0138163. doi:10.1371/journal.pone.0138163

**Published:** September 9, 2015

**Copyright:** © 2015 Zoltán Tóth. This is an open access article distributed under the terms of the [Creative Commons Attribution License](#), which permits unrestricted use, distribution, and reproduction in any medium, provided the original author and source are credited.

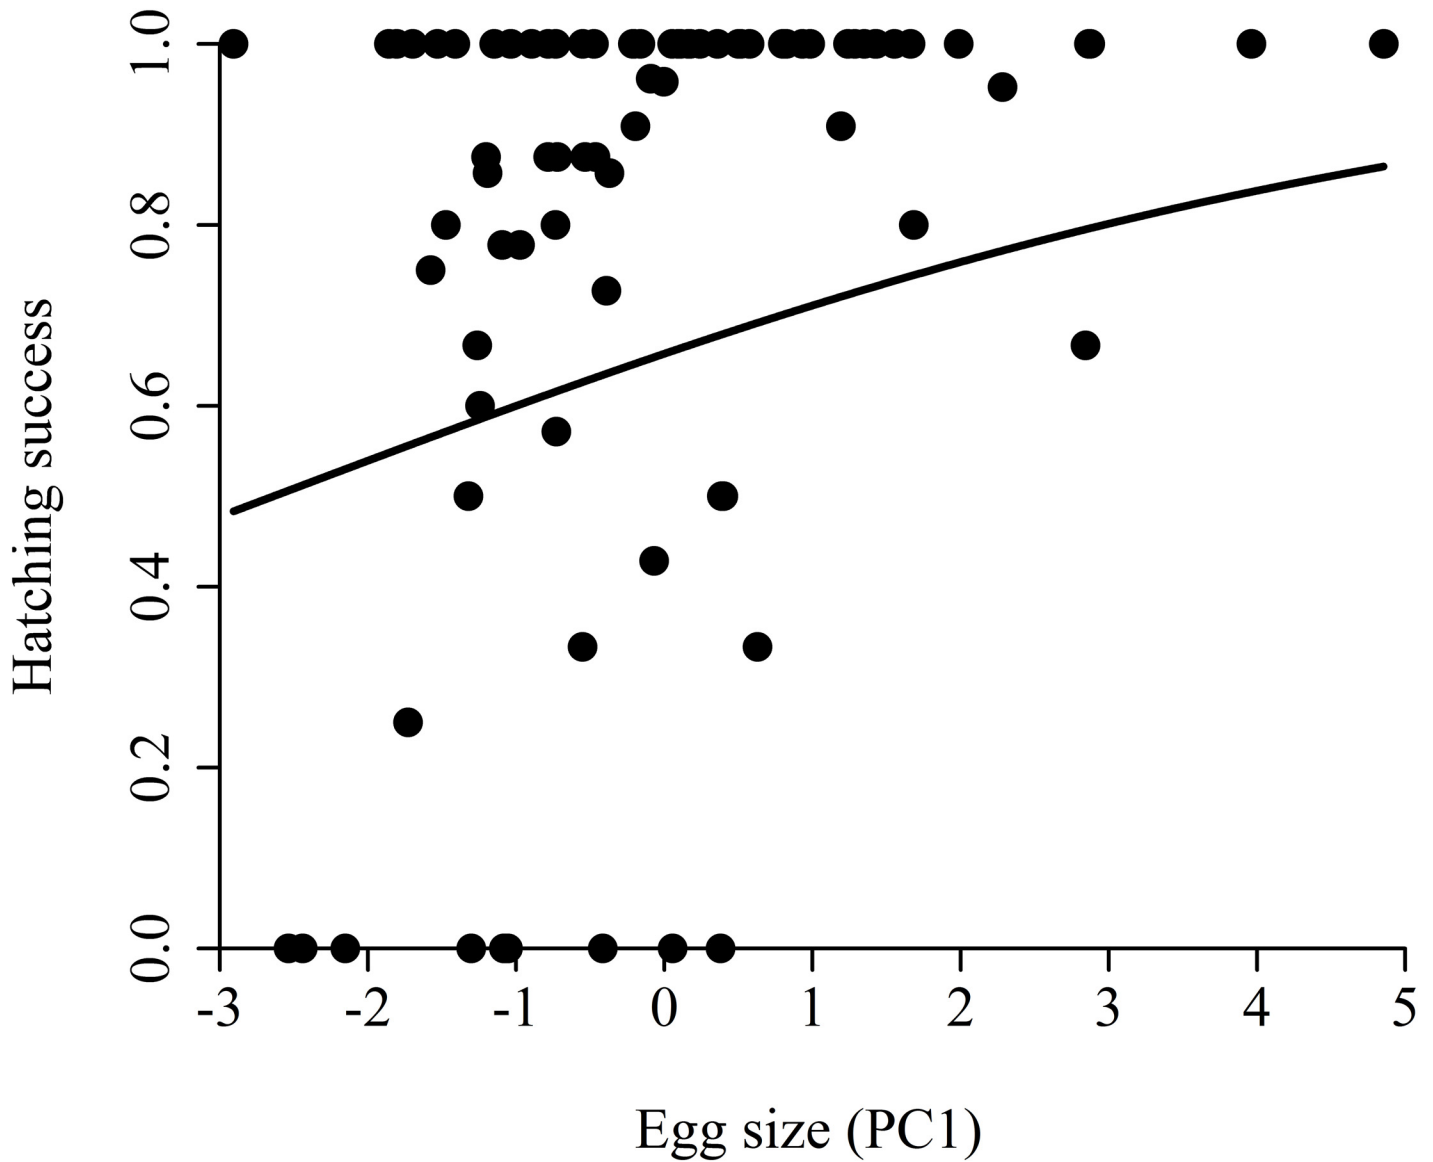

**Fig 3. Relationship between hatching success and egg size.** Hatching success was calculated as the proportion of hatched eggs in each environment. As environment had no effect on hatching success, the regression line is fitted to the pooled data.

doi:10.1371/journal.pone.0138163.g001

### Reference

1. Tóth Z (2015) Context-Dependent Plastic Response during Egg-Laying in a Widespread Newt Species. PLoS ONE 10(8): e0136044. doi: [10.1371/journal.pone.0136044](https://doi.org/10.1371/journal.pone.0136044) PMID: [26291328](https://pubmed.ncbi.nlm.nih.gov/26291328/)
